# Supplementary material for: Weaning and stunting affect nitrogen and carbon stable isotope natural abundances in the hair of young children
Source: PubMed Central journal article supplement (PMC7018826; doi:10.1038/s41598-020-59402-8), 2020-02-13
Supplement: 41598_2020_59402_MOESM1_ESM.pdf [file 41598_2020_59402_MOESM1_ESM.pdf]

**Weaning and stunting affect nitrogen and carbon stable isotope natural abundances in the hair of young children**

**Trenton Dailey-Chwalibóg<sup>†1,2,3</sup>, Jean-François Huneau<sup>†\*1</sup>, Véronique Mathé<sup>1</sup>, Patrick Kolsteren<sup>2</sup>, François Mariotti<sup>1</sup>, Md. Rayhan Mostak<sup>4,5</sup>, Md. Abdul Alim<sup>6</sup>, Murad Md. Shamsheer Tabris Khan<sup>6</sup>, Md. Abdul Hashem Khan<sup>7</sup>, Benjamin Guesdon<sup>3</sup>, Helene Fouillet<sup>\*1</sup>**

1 Université Paris-Saclay, AgroParisTech, INRAE, UMR PNCA, Paris, France

2 Department of Food Technology, Safety and Health, Ghent University, Belgium

3 Department of Expertise and Advocacy, Action Contre la Faim (ACF) Paris, France

4 Palli Karma-Sahayak Foundation (PKSF), Dhaka, Bangladesh

5 Action Against Hunger (AAH), Dhaka, Bangladesh

6 National Nutrition Service (NNS), Institute of Public Health Nutrition (IPHN), Dhaka, Bangladesh

7 Community Based Health Care (CBHC), Dhaka, Bangladesh

†These authors contributed equally.

\*Author to whom correspondence should be addressed (jean\_francois.huneau@agroparistech.fr and/or helene.fouillet@agroparistech.fr).

**Supplementary Table S1: SMART sample description.**

| <b>Variable</b>           | <b>Sample size</b> |             |
|---------------------------|--------------------|-------------|
| <b>Age (months)</b>       | 654                | 30.7 ± 15.6 |
| <b>Height-length (cm)</b> | 655                | 84.5 ± 11.0 |
| <b>Weight (kg)</b>        | 655                | 10.9 ± 2.6  |
| <b>Female</b>             | 656                | 318 (48.5%) |
| <b>Breastfed</b>          | 653                | 265 (40.6%) |
| <b>Wasted</b>             | 656                | 104 (15.8%) |
| <b>Severely wasted</b>    | 656                | 28 (4.3%)   |
| <b>Stunted</b>            | 656                | 243 (37.0%) |
| <b>Severely stunted</b>   | 656                | 76 (11.6%)  |

Values are means ± SD or n (%)

**Supplementary Table S2: Effect of age and breastfeeding status on the risk of being wasted or stunted.**

|                  | Age (months)     |          | Breastfeeding status |          |
|------------------|------------------|----------|----------------------|----------|
|                  | OR               | <i>P</i> | OR                   | <i>P</i> |
| Wasted           | 0.98 [0.96-1.00] | < 0.05   | 2.42 [1.29-4.56]     | < 0.01   |
| Severely wasted  | 0.96 [0.93-0.99] | < 0.05   | 3.80 [1.42-10.76]    | < 0.01   |
| Stunted          | 1.02 [1.00-1.03] | NS       | 0.73 [0.42-1.27]     | NS       |
| Severely stunted | 1.02 [0.99-1.04] | NS       | 0.70 [0.26-1.70]     | NS       |

OR, odds ratio [95% CI]. Breastfeeding status was assessed based on caregiver declaration. For breastfeeding status, two categories were considered: children exclusively or partially breastfed (breastfeeding status = 1) and fully weaned children (breastfeeding status = 0).

**Supplementary Table S3: Effects of sex, breastfeeding status, wasting and stunting on the raw (unadjusted)  $\delta^{15}\text{N}$  and  $\delta^{13}\text{C}$  data.**

|                                   | $\delta^{15}\text{N}$ | $\delta^{13}\text{C}$ |
|-----------------------------------|-----------------------|-----------------------|
| <b>Sex</b>                        |                       |                       |
| <b>Boys (n=135)</b>               | 8.71 ± 1.18           | -22.16 ± 0.76         |
| <b>Girls (n=120)</b>              | 8.79 ± 1.33           | -22.21 ± 0.73         |
| <b>Breastfeeding status</b>       |                       |                       |
| <b>Fully breastfed (n=7)</b>      | 11.45 ± 0.70          | -22.02 ± 0.45         |
| <b>Partially breastfed (n=78)</b> | 9.73 ± 1.22**         | -21.92 ± 0.68         |
| <b>Fully weaned (n=170)</b>       | 8.19 ± 0.78**         | -22.32 ± 0.76*        |
| <b>Wasting</b>                    |                       |                       |
| <b>Not wasted (n=205)</b>         | 8.67 ± 1.22           | -22.20 ± 0.78         |
| <b>Wasted (n=50)</b>              | 9.08 ± 1.34*          | -22.13 ± 0.61         |
| <b>Severely wasted (n=18)</b>     | 9.31 ± 1.39*          | -22.26 ± 0.73         |
| <b>Stunting</b>                   |                       |                       |
| <b>Not stunted (n=162)</b>        | 8.89 ± 1.32           | -22.14 ± 0.73         |
| <b>Stunted (n=93)</b>             | 8.51 ± 1.10*          | -22.28 ± 0.78         |
| <b>Severely stunted (n=25)</b>    | 8.13 ± 0.85**         | -22.63 ± 0.94**       |

$\delta^{15}\text{N}$  and  $\delta^{13}\text{C}$  values (‰) are means ± SD. \* and \*\* indicate differences from the first line of each block,  $P < 0.05$  and  $P < 0.01$ .

**Supplementary Table S4: Raw and age- and breastfeeding-adjusted odd ratios for the risk of being wasted or stunted according to hair  $\delta^{15}\text{N}$  or  $\delta^{13}\text{C}$  values.**

|                         |                       | <b>Unadjusted</b> |          | <b>Adjusted</b>  |          |
|-------------------------|-----------------------|-------------------|----------|------------------|----------|
|                         |                       | OR [CI 95]        | <i>P</i> | OR [CO 95]       | <i>P</i> |
| <b>Wasted</b>           | $\delta^{15}\text{N}$ | 1.28 [1.01-1.62]  | 0.04     | 1.08 [0.78-1.51] | NS       |
|                         | $\delta^{13}\text{C}$ | 1.13 [0.75-1.74]  | NS       | 0.95 [0.60-1.52] | NS       |
| <b>Severely wasted</b>  | $\delta^{15}\text{N}$ | 1.44 [1.01-2.02]  | 0.04     | 1.11 [0.70-1.78] | NS       |
|                         | $\delta^{13}\text{C}$ | 0.90 [0.48-1.69]  | NS       | 0.61 [0.29-1.24] | NS       |
| <b>Stunted</b>          | $\delta^{15}\text{N}$ | 0.77 [0.62-0.96]  | 0.02     | 0.79 [0.58-1.06] | NS       |
|                         | $\delta^{13}\text{C}$ | 0.78 [0.55-1.10]  | NS       | 0.90 [0.62-1.31] | NS       |
| <b>Severely stunted</b> | $\delta^{15}\text{N}$ | 0.54 [0.32-0.82]  | < 0.01   | 0.53 [0.29-0.91] | 0.02     |
|                         | $\delta^{13}\text{C}$ | 0.43 [0.24-0.76]  | < 0.01   | 0.55 [0.28-1.02] | 0.06     |

OR, odds ratio [95% CI].

### Supplementary analyses

Using a mixed procedure for repeated data (PROC MIXED, SAS 9.14, Cary, NC), we assessed the change in  $\delta^{15}\text{N}$  and  $\delta^{13}\text{C}$  between two consecutive segments of hair, the first and second adjacent 5 mm segments closest to the scalp. The first (proximal) segment corresponds with the more recent period, from -3 to -1 weeks before sampling. The second (distal) segment corresponds with the earlier period, from -5 to -3 weeks before sampling. Because the data presented in Figure 1 and Table 4 of the manuscript suggest that the age of children at inclusion may affect the change in  $\delta^{15}\text{N}$  and  $\delta^{13}\text{C}$  between the two segments, age at inclusion was included as a covariate in the model.

Our results indicate a slight but significant (-0.03) decrease in both  $\delta^{15}\text{N}$  and  $\delta^{13}\text{C}$  from the distal to the proximal segment, corresponding to a more recent period of 2 weeks (**Supplementary Table S5**). These results are in line with a progressive decrease in  $\delta^{15}\text{N}$  and  $\delta^{13}\text{C}$  observed between 6 months and 5 years, due to the weaning process.

**Supplementary Table S5:  $\delta^{15}\text{N}$  and  $\delta^{13}\text{C}$  evolution between two consecutive hair segments**

| Fixed effects of the mixed model <sup>1</sup> : |                                                 |                                                   |
|-------------------------------------------------|-------------------------------------------------|---------------------------------------------------|
|                                                 | $\delta^{15}\text{N}$                           | $\delta^{13}\text{C}$                             |
| Segment                                         | $P < 0.05$                                      | $P < 0.05$                                        |
| Age at inclusion                                | $P < 0.0001$                                    | $P < 0.0001$                                      |
| Post-hoc comparisons:                           |                                                 |                                                   |
|                                                 | Distal segment<br>(-5 to -3 weeks) <sup>2</sup> | Proximal segment<br>(-3 to -1 weeks) <sup>2</sup> |
| $\delta^{15}\text{N}$                           | $8.78 \pm 0.06$                                 | $8.75 \pm 0.06^*$                                 |
| $\delta^{13}\text{C}$                           | $-22.15 \pm 0.05$                               | $-22.18 \pm 0.04^*$                               |

<sup>1</sup>Type 3 fixed effects of the mixed model

<sup>2</sup>  $\delta^{15}\text{N}$  and  $\delta^{13}\text{C}$  values (‰) are least-square means  $\pm$  SE

\* significantly different from the older segment,  $P < 0.05$

We evaluated the effect of wasting and stunting on this isotopic change and did not find evidence of interaction between wasting or stunting and the changes in  $\delta^{15}\text{N}$  and  $\delta^{13}\text{C}$  between distal and proximal segments (**Supplementary Table S6**). This suggests that the low  $\delta^{15}\text{N}$  and  $\delta^{13}\text{C}$  values observed in severely stunted children are due to dietary or metabolic changes that occurred before the one-month period covered by the two consecutive hair segments.

**Supplementary Table S6: Effect of stunting and wasting on  $\delta^{15}\text{N}$  and  $\delta^{13}\text{C}$  evolution between two consecutive hair segments**

| Fixed effects and interaction mixed models <sup>1</sup> : |                         | $\delta^{15}\text{N}$ | $\delta^{13}\text{C}$ |
|-----------------------------------------------------------|-------------------------|-----------------------|-----------------------|
| Model for wasting                                         | Segment                 | $P < 0.05$            | $P = 0.10$            |
|                                                           | Age at inclusion        | $P < 0.0001$          | $P < 0.0001$          |
|                                                           | Wasting                 | NS                    | NS                    |
|                                                           | Segment*Wasting         | NS                    | NS                    |
| Model for severe wasting                                  | Segment                 | $P = 0.06$            | $P = 0.05$            |
|                                                           | Age at inclusion        | $P < 0.0001$          | $P < 0.0001$          |
|                                                           | Severe wasting          | NS                    | NS                    |
|                                                           | Segment*Severe wasting  | NS                    | NS                    |
| Model for stunting                                        | Segment                 | $P < 0.05$            | $P < 0.05$            |
|                                                           | Age at inclusion        | $P < 0.0001$          | $P < 0.0001$          |
|                                                           | Stunting                | NS                    | NS                    |
|                                                           | Segment*Stunting        | NS                    | NS                    |
| Model for severe stunting                                 | Segment                 | $P < 0.01$            | NS                    |
|                                                           | Age at inclusion        | $P < 0.0001$          | $P < 0.0001$          |
|                                                           | Severe stunting         | $P < 0.01$            | $P < 0.01$            |
|                                                           | Segment*Severe stunting | NS                    | NS                    |

<sup>1</sup>Type 3 fixed effects and interaction of the mixed model.

## Supplementary table S7: individual data

## Data description:

- id: subject number
- sex: 1 = boy, 2 = girl
- age: age in months
- H: height or length in cm
- W: weight in kg
- MUAC: mid-upper arm circumference in cm
- group: breastfeeding group, weaned=weaned, part\_bf=partially breastfed, ful\_bf=fully breastfed.
- segment: proximal = 5 mm segment closest to the scalp, distal=next 5 mm segment.
- $\Delta^{15}\text{N}$  and  $\delta^{13}\text{C}$  in ‰
- C:N ratio
- . indicates a missing data

| id   | sex | age | H      | W     | MUAC  | group   | segment  | $\delta^{15}\text{N}$ | $\delta^{13}\text{C}$ | C:N ratio |
|------|-----|-----|--------|-------|-------|---------|----------|-----------------------|-----------------------|-----------|
| 1004 | 2   | 53  | 102.75 | 16.05 | 163.5 | weaned  | distal   | 7.56                  | -22.83                | 3.22      |
| 1004 | 2   | 53  | 102.75 | 16.05 | 163.5 | weaned  | proximal | 7.43                  | -23.45                | 3.54      |
| 1006 | 1   | 29  | 81.95  | 9.55  | 122.5 | weaned  | distal   | 8.17                  | -22.53                | 3.01      |
| 1006 | 1   | 29  | 81.95  | 9.55  | 122.5 | weaned  | proximal | 8.48                  | -22.92                | 3.12      |
| 1008 | 1   | 23  | 78.4   | 8.65  | 125.5 | part_bf | distal   | 9.24                  | -22.76                | 3.06      |
| 1008 | 1   | 23  | 78.4   | 8.65  | 125.5 | part_bf | proximal | 9.32                  | -22.37                | 3.05      |
| 1010 | 1   | 28  | 71.25  | 7.3   | 124.5 | part_bf | distal   | 8.41                  | -23.01                | 3.21      |
| 1010 | 1   | 28  | 71.25  | 7.3   | 124.5 | part_bf | proximal | 8.3                   | -22.87                | 3.17      |
| 1014 | 2   | 49  | 89.15  | 12.15 | 151   | weaned  | distal   | 8.56                  | -23.44                | 2.97      |
| 1014 | 2   | 49  | 89.15  | 12.15 | 151   | weaned  | proximal | 8.09                  | -23.24                | 3.09      |
| 1016 | 2   | 37  | 92.25  | 15.65 | 175.5 | part_bf | distal   | 7.78                  | -23.53                | 2.98      |
| 1016 | 2   | 37  | 92.25  | 15.65 | 175.5 | part_bf | proximal | 7.39                  | -23.51                | 3.27      |
| 1017 | 2   | 38  | 93.65  | 13.05 | 158.5 | weaned  | distal   | 8.57                  | -21.23                | 3.25      |
| 1017 | 2   | 38  | 93.65  | 13.05 | 158.5 | weaned  | proximal | 8.65                  | -21.2                 | 3.21      |
| 1019 | 1   | 56  | 104.35 | 15.45 | 155.5 | weaned  | distal   | 7.5                   | -22.42                | 3.00      |
| 1019 | 1   | 56  | 104.35 | 15.45 | 155.5 | weaned  | proximal | 7.47                  | -22.45                | 2.99      |
| 1021 | 1   | 55  | 97.35  | 12.05 | 132.5 | weaned  | distal   | 7.17                  | -22.75                | 3.28      |
| 1021 | 1   | 55  | 97.35  | 12.05 | 132.5 | weaned  | proximal | 7.16                  | -22.83                | 3.39      |
| 1023 | 1   | 46  | 90.55  | 11.65 | 147.5 | weaned  | distal   | 7.28                  | -22.98                | 3.14      |
| 1023 | 1   | 46  | 90.55  | 11.65 | 147.5 | weaned  | proximal | 7.56                  | -22.93                | 3.07      |
| 1025 | 2   | 58  | 100.55 | 14.65 | 163.5 | weaned  | distal   | 7.72                  | -22.92                | 2.99      |
| 1025 | 2   | 58  | 100.55 | 14.65 | 163.5 | weaned  | proximal | 8.05                  | -22.71                | 3.08      |
| 1026 | 1   | 21  | 87.35  | 9.45  | 135.5 | part_bf | distal   | 10.08                 | -21.76                | 3.06      |
| 1026 | 1   | 21  | 87.35  | 9.45  | 135.5 | part_bf | proximal | 10.02                 | -21.65                | 2.97      |
| 1027 | 2   | 59  | 103.35 | 16.25 | 156.5 | weaned  | distal   | 8.06                  | -22.51                | 3.2       |
| 1027 | 2   | 59  | 103.35 | 16.25 | 156.5 | weaned  | proximal | 7.7                   | -22.5                 | 3.32      |
| 1031 | 2   | 30  | 83.45  | 12.05 | 149   | weaned  | distal   | 7.23                  | -21.97                | 2.96      |
| 1031 | 2   | 30  | 83.45  | 12.05 | 149   | weaned  | proximal | 7.52                  | -22.5                 | 3.39      |
| 1037 | 2   | 32  | 82.65  | 11.45 | 155.5 | weaned  | distal   | 7.82                  | -22.17                | 3.32      |
| 1037 | 2   | 32  | 82.65  | 11.45 | 155.5 | weaned  | proximal | 7.53                  | -22.39                | 3.06      |
| 1040 | 2   | 39  | 95.4   | 14.05 | 149.5 | weaned  | distal   | 7.77                  | -22.63                | 3.11      |
| 1040 | 2   | 39  | 95.4   | 14.05 | 149.5 | weaned  | proximal | 7.92                  | -22.69                | 3.39      |
| 1044 | 1   | 52  | 99.95  | 12.85 | 140.5 | weaned  | distal   | 7.62                  | -22.27                | 3.09      |



|      |   |    |        |       |       |         |          |       |        |      |
|------|---|----|--------|-------|-------|---------|----------|-------|--------|------|
| 1044 | 1 | 52 | 99.95  | 12.85 | 140.5 | weaned  | proximal | 7.42  | -22.49 | 3.12 |
| 1046 | 2 | 34 | 85.95  | 10.95 | 139.5 | weaned  | distal   | 7.15  | -22.84 | 3.08 |
| 1046 | 2 | 34 | 85.95  | 10.95 | 139.5 | weaned  | proximal | 7.04  | -23.31 | 3.35 |
| 1052 | 2 | 43 | 84.25  | 9.35  | 121.5 | weaned  | distal   | 8.24  | -22.07 | 3.05 |
| 1052 | 2 | 43 | 84.25  | 9.35  | 121.5 | weaned  | proximal | 8.03  | -22.3  | 3.05 |
| 1054 | 2 | 48 | 94.35  | 11.85 | 139.5 | weaned  | distal   | 7.86  | -23.14 | 3.2  |
| 1054 | 2 | 48 | 94.35  | 11.85 | 139.5 | weaned  | proximal | 7.81  | -22.85 | 3.27 |
| 1056 | 2 | 50 | 90.55  | 14.45 | 157.5 | weaned  | distal   | 7.01  | -24.15 | 2.97 |
| 1056 | 2 | 50 | 90.55  | 14.45 | 157.5 | weaned  | proximal | 6.99  | -24.14 | 3.02 |
| 1060 | 1 | 39 | 88.35  | 13.45 | 156.5 | weaned  | distal   | 8.24  | -22.27 | 3.19 |
| 1060 | 1 | 39 | 88.35  | 13.45 | 156.5 | weaned  | proximal | 7.98  | -22.59 | 3.24 |
| 1062 | 2 | 38 | 91.15  | 11.25 | 141.5 | weaned  | distal   | 8.48  | -21.43 | 3.04 |
| 1062 | 2 | 38 | 91.15  | 11.25 | 141.5 | weaned  | proximal | 8.43  | -21.57 | 3.05 |
| 1064 | 1 | 12 | 71.05  | 8.25  | 137.5 | part_bf | distal   | 9.95  | -22.47 | 3.08 |
| 1064 | 1 | 12 | 71.05  | 8.25  | 137.5 | part_bf | proximal | 10.06 | -22.27 | 3.14 |
| 1066 | 1 | 57 | 108.25 | 18.35 | 161.5 | weaned  | distal   | 8.17  | -22.65 | 3.16 |
| 1066 | 1 | 57 | 108.25 | 18.35 | 161.5 | weaned  | proximal | 7.9   | -23.43 | 3.53 |
| 1068 | 1 | 9  | 68.45  | 8.55  | 136.5 | part_bf | distal   | 12.17 | -22.49 | 3.17 |
| 1068 | 1 | 9  | 68.45  | 8.55  | 136.5 | part_bf | proximal | 12.08 | -22.39 | 3.13 |
| 1070 | 2 | 47 | 100.25 | 14.85 | 151.5 | weaned  | distal   | 9.04  | -20.75 | 3.15 |
| 1070 | 2 | 47 | 100.25 | 14.85 | 151.5 | weaned  | proximal | 8.61  | -21.3  | 3.09 |
| 1074 | 1 | 57 | 108.85 | 16.55 | 161   | weaned  | distal   | 7.47  | -22.74 | 3.07 |
| 1074 | 1 | 57 | 108.85 | 16.55 | 161   | weaned  | proximal | 7.49  | -22.98 | 3.17 |
| 1076 | 1 | 10 | 71.45  | 8.65  | 137.5 | part_bf | distal   | 10.78 | -22.13 | 3.04 |
| 1076 | 1 | 10 | 71.45  | 8.65  | 137.5 | part_bf | proximal | 10.5  | -22.43 | 3.12 |
| 1078 | 1 | 51 | 112.1  | 19.55 | 171.5 | weaned  | distal   | 8.77  | -22.1  | 3.01 |
| 1078 | 1 | 51 | 112.1  | 19.55 | 171.5 | weaned  | proximal | 8.99  | -21.94 | 3.06 |
| 1081 | 2 | 56 | 97.25  | 14.85 | 162.5 | weaned  | distal   | 8.63  | -22.71 | 3.12 |
| 1081 | 2 | 56 | 97.25  | 14.85 | 162.5 | weaned  | proximal | 8.42  | -22.51 | 3.02 |
| 1086 | 2 | 33 | 90.15  | 13.55 | 155.5 | weaned  | distal   | 7.59  | -23.31 | 3.13 |
| 1086 | 2 | 33 | 90.15  | 13.55 | 155.5 | weaned  | proximal | 7.73  | -23.56 | 3.12 |
| 1088 | 1 | 44 | 95.35  | 13.65 | 151.5 | weaned  | distal   | 8.18  | -22.53 | 3.03 |
| 1088 | 1 | 44 | 95.35  | 13.65 | 151.5 | weaned  | proximal | 7.87  | -22.73 | 3.13 |
| 1092 | 1 | 52 | 98.55  | 15.55 | 151.5 | weaned  | distal   | 7.38  | -23.27 | 3.1  |
| 1092 | 1 | 52 | 98.55  | 15.55 | 151.5 | weaned  | proximal | 7.09  | -23.34 | 3.08 |
| 1094 | 1 | 50 | 94.55  | 13.05 | 142.5 | weaned  | distal   | 7.3   | -22.99 | 3.09 |
| 1094 | 1 | 50 | 94.55  | 13.05 | 142.5 | weaned  | proximal | 6.82  | -23.35 | 3.08 |
| 1095 | 1 | 36 | 90.15  | 10.05 | 133.5 | weaned  | distal   | 8.63  | -22.16 | 3.05 |
| 1095 | 1 | 36 | 90.15  | 10.05 | 133.5 | weaned  | proximal | 8.51  | -22.47 | 2.95 |
| 1096 | 2 | 22 | 77.25  | 9.45  | 139.5 | part_bf | distal   | 9.09  | -21.57 | 3.15 |
| 1096 | 2 | 22 | 77.25  | 9.45  | 139.5 | part_bf | proximal | 8.9   | -21.54 | 3.16 |
| 1097 | 2 | 48 | 100.95 | 13.35 | 149.5 | weaned  | distal   | 8.2   | -21.7  | 3.13 |
| 1097 | 2 | 48 | 100.95 | 13.35 | 149.5 | weaned  | proximal | 8.03  | -21.67 | 3.13 |
| 1099 | 2 | 29 | 83.25  | 9.35  | 126.5 | weaned  | distal   | 8.38  | -22.62 | 3.02 |
| 1099 | 2 | 29 | 83.25  | 9.35  | 126.5 | weaned  | proximal | 8.61  | -22.51 | 3.1  |
| 1103 | 2 | 58 | 96.05  | 12.15 | 142.5 | weaned  | distal   | 8.94  | -21.00 | 3.04 |
| 1103 | 2 | 58 | 96.05  | 12.15 | 142.5 | weaned  | proximal | 8.82  | -20.86 | 3.22 |
| 1105 | 1 | 19 | 77.45  | 9.65  | 146.5 | part_bf | distal   | 10.55 | -20.84 | 3.18 |
| 1105 | 1 | 19 | 77.45  | 9.65  | 146.5 | part_bf | proximal | 10.74 | -20.69 | 3.2  |

|      |   |    |        |       |       |         |          |       |        |      |
|------|---|----|--------|-------|-------|---------|----------|-------|--------|------|
| 1109 | 2 | 7  | 71.05  | 9.55  | 162.5 | ful_bf  | distal   | 11.34 | -21.79 | 3.23 |
| 1109 | 2 | 7  | 71.05  | 9.55  | 162.5 | ful_bf  | proximal | 11.31 | -21.85 | 3.28 |
| 1111 | 1 | 20 | 83.45  | 11.15 | 143.5 | part_bf | distal   | 8.32  | -21.55 | 3.43 |
| 1111 | 1 | 20 | 83.45  | 11.15 | 143.5 | part_bf | proximal | 8.45  | -21.18 | 3.25 |
| 1113 | 2 | 15 | 76.15  | 9.05  | 131.5 | weaned  | distal   | 10.6  | -22.86 | 3.59 |
| 1113 | 2 | 15 | 76.15  | 9.05  | 131.5 | weaned  | proximal | 10.38 | -22.99 | 3.74 |
| 1119 | 1 | 28 | 88.65  | 12.15 | 147.5 | part_bf | distal   | 9.27  | -22.49 | 3.11 |
| 1119 | 1 | 28 | 88.65  | 12.15 | 147.5 | part_bf | proximal | 9.13  | -22.44 | 3.01 |
| 1121 | 1 | 38 | 93.25  | 12.35 | 143.5 | weaned  | distal   | 8.66  | -22.5  | 3.15 |
| 1121 | 1 | 38 | 93.25  | 12.35 | 143.5 | weaned  | proximal | 8.79  | -22.58 | 2.97 |
| 1123 | 1 | 56 | 99.15  | 13.35 | 139.5 | weaned  | distal   | 7.71  | -23.8  | 3.05 |
| 1123 | 1 | 56 | 99.15  | 13.35 | 139.5 | weaned  | proximal | 7.67  | -23.79 | 3.08 |
| 1132 | 1 | 15 | 74.25  | 7.05  | 114   | part_bf | distal   | 10.33 | -22.49 | 3.06 |
| 1132 | 1 | 15 | 74.25  | 7.05  | 114   | part_bf | proximal | 10.23 | -22.53 | 3.35 |
| 1133 | 1 | 27 | 83.6   | 12.15 | 151.5 | weaned  | distal   | 8.4   | -22.6  | 3.2  |
| 1133 | 1 | 27 | 83.6   | 12.15 | 151.5 | weaned  | proximal | 7.86  | -23.24 | 3.34 |
| 1134 | 1 | 48 | 94.55  | 12.4  | 143.5 | weaned  | distal   | 8.52  | -22.76 | 3.06 |
| 1134 | 1 | 48 | 94.55  | 12.4  | 143.5 | weaned  | proximal | 8.45  | -22.88 | 3.02 |
| 1140 | 1 | 39 | 88.25  | 10.15 | 135.5 | weaned  | distal   | 9.09  | -22.05 | 3.07 |
| 1140 | 1 | 39 | 88.25  | 10.15 | 135.5 | weaned  | proximal | 9.19  | -22.15 | 3.2  |
| 1142 | 2 | 54 | 97.85  | 11.95 | 128.5 | weaned  | distal   | 7.95  | -22.31 | 3.15 |
| 1142 | 2 | 54 | 97.85  | 11.95 | 128.5 | weaned  | proximal | 7.98  | -22.19 | 3.14 |
| 1144 | 2 | 52 | 89.45  | 10.25 | 134.5 | weaned  | distal   | 7.8   | -22.85 | 3.1  |
| 1144 | 2 | 52 | 89.45  | 10.25 | 134.5 | weaned  | proximal | 7.55  | -22.66 | 3.11 |
| 1148 | 2 | 48 | 95.05  | 12.9  | 141.5 | weaned  | distal   | 8.26  | -22.13 | 3.13 |
| 1148 | 2 | 48 | 95.05  | 12.9  | 141.5 | weaned  | proximal | 8.25  | -22.64 | 3.31 |
| 1154 | 1 | 11 | 72.05  | 9.25  | 158.5 | part_bf | distal   | 10.69 | -21.7  | 3.06 |
| 1154 | 1 | 11 | 72.05  | 9.25  | 158.5 | part_bf | proximal | 10.57 | -22.1  | 3.03 |
| 1156 | 2 | 32 | 87.05  | 13.55 | 164.5 | weaned  | distal   | 9.94  | -22.14 | 3.17 |
| 1156 | 2 | 32 | 87.05  | 13.55 | 164.5 | weaned  | proximal | 9.89  | -22.41 | 3.01 |
| 1163 | 1 | 15 | 72.85  | 8.15  | 125.5 | part_bf | distal   | 10.77 | -21.3  | 3.23 |
| 1163 | 1 | 15 | 72.85  | 8.15  | 125.5 | part_bf | proximal | 10.88 | -21.62 | 3.27 |
| 1165 | 2 | 26 | 76.45  | 8.25  | 129.5 | weaned  | distal   | 8.48  | -21.12 | 3.16 |
| 1165 | 2 | 26 | 76.45  | 8.25  | 129.5 | weaned  | proximal | 8.55  | -21.37 | 3.17 |
| 1169 | 1 | 49 | 92.25  | 11.85 | 134.5 | weaned  | distal   | 8.65  | -21.4  | 3.12 |
| 1169 | 1 | 49 | 92.25  | 11.85 | 134.5 | weaned  | proximal | 8.55  | -21.56 | 3.05 |
| 1173 | 2 | 43 | 87.75  | 10.7  | 137.5 | weaned  | distal   | 8.16  | -21.62 | 3.08 |
| 1173 | 2 | 43 | 87.75  | 10.7  | 137.5 | weaned  | proximal | 8.14  | -21.71 | 3.32 |
| 1175 | 2 | 6  | 61.65  | 7.85  | 152.5 | part_bf | distal   | 8.24  | -22.97 | 3.84 |
| 1175 | 2 | 6  | 61.65  | 7.85  | 152.5 | part_bf | proximal | 8.58  | -21.97 | 3.19 |
| 1181 | 1 | 54 | 100.15 | 14.95 | 155.5 | weaned  | distal   | 7.58  | -22.92 | 3.04 |
| 1181 | 1 | 54 | 100.15 | 14.95 | 155.5 | weaned  | proximal | 7.17  | -23.07 | 3.01 |
| 1184 | 2 | 47 | 97.55  | 13.7  | 146.5 | weaned  | distal   | 8.09  | -22.98 | 3.48 |
| 1184 | 2 | 47 | 97.55  | 13.7  | 146.5 | weaned  | proximal | 8.02  | -22.54 | 3.31 |
| 1187 | 2 | 48 | 89.75  | 12.3  | 146.5 | weaned  | distal   | 8.43  | -21.02 | 3.03 |
| 1187 | 2 | 48 | 89.75  | 12.3  | 146.5 | weaned  | proximal | 8.11  | -21.27 | 3.01 |
| 2004 | 2 | 7  | 65.05  | 6.8   | 135   | part_bf | distal   | 7.25  | -23.22 | 3.05 |
| 2004 | 2 | 7  | 65.05  | 6.8   | 135   | part_bf | proximal | 6.97  | -23.84 | 3.54 |
| 2007 | 1 | 49 | 100.8  | 14.4  | 154.5 | weaned  | distal   | 8.31  | -22.49 | 3.1  |

|      |   |    |        |       |       |         |          |       |        |      |
|------|---|----|--------|-------|-------|---------|----------|-------|--------|------|
| 2007 | 1 | 49 | 100.8  | 14.4  | 154.5 | weaned  | proximal | 8.2   | -22.54 | 3.24 |
| 2010 | 2 | 50 | 90.2   | 12.65 | 176.5 | weaned  | distal   | 8.46  | -24.53 | 2.99 |
| 2010 | 2 | 50 | 90.2   | 12.65 | 176.5 | weaned  | proximal | 8.29  | -24.26 | 3.15 |
| 2012 | 1 | 53 | 102.45 | 14.2  | 137.5 | weaned  | distal   | 7.63  | -22.51 | 3.08 |
| 2012 | 1 | 53 | 102.45 | 14.2  | 137.5 | weaned  | proximal | 7.32  | -22.38 | 3.14 |
| 2014 | 2 | 31 | 84.45  | 9.6   | 147   | part_bf | distal   | 9.67  | -22.7  | 3.01 |
| 2014 | 2 | 31 | 84.45  | 9.6   | 147   | part_bf | proximal | 9.8   | -22.61 | 2.98 |
| 2019 | 2 | 23 | 84.15  | 10.2  | 143.5 | weaned  | distal   | 8.66  | -20.98 | 2.98 |
| 2019 | 2 | 23 | 84.15  | 10.2  | 143.5 | weaned  | proximal | 8.63  | -20.77 | 3.14 |
| 2021 | 1 | 46 | 91.85  | 10.6  | 129   | weaned  | distal   | 8.14  | -21.38 | 3.00 |
| 2021 | 1 | 46 | 91.85  | 10.6  | 129   | weaned  | proximal | 8.21  | -21.65 | 3.02 |
| 2022 | 1 | 55 | 97.55  | 13.2  | 143.5 | weaned  | distal   | 7.89  | -22.17 | 3.05 |
| 2022 | 1 | 55 | 97.55  | 13.2  | 143.5 | weaned  | proximal | 7.73  | -22.47 | 3.04 |
| 2025 | 1 | 52 | 97.1   | 11.6  | 140   | weaned  | distal   | 7.45  | -22.88 | 3.34 |
| 2025 | 1 | 52 | 97.1   | 11.6  | 140   | weaned  | proximal | 7.69  | -22.06 | 3.09 |
| 2027 | 1 | 46 | 88.95  | 11.7  | 148   | weaned  | distal   | 7.08  | -22.59 | 3.28 |
| 2027 | 1 | 46 | 88.95  | 11.7  | 148   | weaned  | proximal | 7.29  | -22.72 | 2.98 |
| 2029 | 2 | 52 | 88.15  | 11.3  | 138.5 | weaned  | distal   | 8.1   | -23.07 | 3.03 |
| 2029 | 2 | 52 | 88.15  | 11.3  | 138.5 | weaned  | proximal | 8.01  | -23.48 | 3.43 |
| 2031 | 1 | 40 | 87.85  | 11.25 | 141.5 | weaned  | distal   | 8.62  | -21.77 | 3.29 |
| 2031 | 1 | 40 | 87.85  | 11.25 | 141.5 | weaned  | proximal | 8.48  | -22.17 | 3.13 |
| 2033 | 1 | 57 | 100.15 | 14.85 | 152.5 | weaned  | distal   | 8.39  | -20.72 | 3.25 |
| 2033 | 1 | 57 | 100.15 | 14.85 | 152.5 | weaned  | proximal | 8.25  | -20.77 | 3.25 |
| 2034 | 2 | 30 | 82.85  | 11.7  | 157   | weaned  | distal   | 7.72  | -21.16 | 3.19 |
| 2034 | 2 | 30 | 82.85  | 11.7  | 157   | weaned  | proximal | 7.93  | -21.59 | 3.02 |
| 2036 | 1 | 35 | 85.6   | 11.2  | 141.5 | part_bf | distal   | 8.36  | -22.69 | 3.12 |
| 2036 | 1 | 35 | 85.6   | 11.2  | 141.5 | part_bf | proximal | 8.19  | -22.52 | 3.11 |
| 2040 | 1 | 57 | 105.3  | 14.4  | 147.5 | weaned  | distal   | 8.62  | -22.5  | 3.09 |
| 2040 | 1 | 57 | 105.3  | 14.4  | 147.5 | weaned  | proximal | 8.05  | -22.47 | 3.14 |
| 2042 | 1 | 37 | 96.5   | 14.2  | 157   | weaned  | distal   | 8.5   | -23.75 | 3.16 |
| 2042 | 1 | 37 | 96.5   | 14.2  | 157   | weaned  | proximal | 8.7   | -23.99 | 3.05 |
| 2044 | 1 | 18 | 77.4   | 7.9   | 123   | part_bf | distal   | 10.15 | -21.27 | 3.3  |
| 2044 | 1 | 18 | 77.4   | 7.9   | 123   | part_bf | proximal | 10.07 | -21.72 | 3.9  |
| 2047 | 1 | 50 | 98.4   | 14.7  | 162.5 | weaned  | distal   | 8.25  | -20.59 | 3.15 |
| 2047 | 1 | 50 | 98.4   | 14.7  | 162.5 | weaned  | proximal | 8.21  | -20.7  | 3.13 |
| 2049 | 1 | 58 | 98.3   | 12.4  | 137   | weaned  | distal   | 8.49  | -21.37 | 3.13 |
| 2049 | 1 | 58 | 98.3   | 12.4  | 137   | weaned  | proximal | 8.33  | -21.29 | 3.08 |
| 2051 | 1 | 29 | 84.9   | 10.2  | 143   | weaned  | distal   | 8.21  | -20.9  | 3.27 |
| 2051 | 1 | 29 | 84.9   | 10.2  | 143   | weaned  | proximal | 8.06  | -20.78 | 3.15 |
| 2053 | 2 | 27 | 76.6   | 7.9   | 123   | part_bf | distal   | 9.37  | -21.97 | 3.11 |
| 2053 | 2 | 27 | 76.6   | 7.9   | 123   | part_bf | proximal | 9.52  | -22.23 | 3.09 |
| 2055 | 1 | 29 | 89.1   | 11.7  | 146   | part_bf | distal   | 8.89  | -20.54 | 3.14 |
| 2055 | 1 | 29 | 89.1   | 11.7  | 146   | part_bf | proximal | 8.81  | -20.79 | 3.22 |
| 2057 | 1 | 46 | 82.85  | 10.7  | 137   | weaned  | distal   | 6.91  | -23.85 | 3.15 |
| 2057 | 1 | 46 | 82.85  | 10.7  | 137   | weaned  | proximal | 6.6   | -24.15 | 3.1  |
| 2059 | 1 | 25 | 80.55  | 10.45 | 147   | part_bf | distal   | 10.31 | -21.91 | 3.13 |
| 2059 | 1 | 25 | 80.55  | 10.45 | 147   | part_bf | proximal | 10.5  | -21.72 | 3.1  |
| 2061 | 2 | 28 | 81.4   | 8.9   | 122.5 | weaned  | distal   | 8.84  | -21.52 | 3.02 |
| 2061 | 2 | 28 | 81.4   | 8.9   | 122.5 | weaned  | proximal | 8.84  | -21.11 | 3.03 |

|      |   |    |       |       |       |         |          |       |        |      |
|------|---|----|-------|-------|-------|---------|----------|-------|--------|------|
| 2063 | 2 | 24 | 79.3  | 7.85  | 123   | part_bf | distal   | 10.82 | -21.56 | 3.09 |
| 2063 | 2 | 24 | 79.3  | 7.85  | 123   | part_bf | proximal | 10.7  | -21.74 | 3.07 |
| 2064 | 2 | 10 | 70.9  | 6.2   | 114   | part_bf | distal   | 9.99  | -21.12 | 3.02 |
| 2064 | 2 | 10 | 70.9  | 6.2   | 114   | part_bf | proximal | 10.12 | -20.85 | 3.13 |
| 2065 | 2 | 28 | 84.65 | 10.35 | 141   | part_bf | distal   | 10.48 | -22.81 | 3.01 |
| 2065 | 2 | 28 | 84.65 | 10.35 | 141   | part_bf | proximal | 10.44 | -22.81 | 3.08 |
| 2067 | 1 | 24 | 78.3  | 9.8   | 148   | weaned  | distal   | 9.67  | -21.86 | 3.01 |
| 2067 | 1 | 24 | 78.3  | 9.8   | 148   | weaned  | proximal | 9.82  | -21.78 | 3.1  |
| 2072 | 1 | 55 | 98.3  | 13.3  | 136.5 | weaned  | distal   | 8.97  | -21.88 | 3.14 |
| 2072 | 1 | 55 | 98.3  | 13.3  | 136.5 | weaned  | proximal | 8.84  | -21.78 | 3.09 |
| 2074 | 1 | 22 | 81.2  | 9.8   | 130.5 | part_bf | distal   | 10.11 | -21.61 | 3.07 |
| 2074 | 1 | 22 | 81.2  | 9.8   | 130.5 | part_bf | proximal | 10.03 | -21.55 | 3.06 |
| 2076 | 1 | 31 | 96.6  | 12    | 134   | weaned  | distal   | 8.29  | .      | 3.02 |
| 2076 | 1 | 31 | 96.6  | 12    | 134   | weaned  | proximal | 7.9   | .      | 3.02 |
| 2080 | 2 | 9  | 68.8  | 8     | 143   | ful_bf  | distal   | 12.46 | -22.09 | 3.22 |
| 2080 | 2 | 9  | 68.8  | 8     | 143   | ful_bf  | proximal | 12.97 | -21.86 | 3.13 |
| 2083 | 1 | 28 | 83.35 | 11.7  | 154   | part_bf | distal   | 9.28  | -22.09 | 3.25 |
| 2083 | 1 | 28 | 83.35 | 11.7  | 154   | part_bf | proximal | 9.32  | -22.07 | 3.14 |
| 2085 | 1 | 40 | 80.9  | 10.9  | 145   | weaned  | distal   | 8.01  | .      | 3.01 |
| 2085 | 1 | 40 | 80.9  | 10.9  | 145   | weaned  | proximal | 7.76  | .      | 3.00 |
| 2087 | 2 | 23 | 81.2  | 10.8  | 143   | weaned  | distal   | 8.52  | -21.78 | 3.14 |
| 2087 | 2 | 23 | 81.2  | 10.8  | 143   | weaned  | proximal | 8.53  | -22.21 | 2.98 |
| 2089 | 2 | 23 | 79.3  | 8.7   | 120   | weaned  | distal   | 8.86  | -21.53 | 2.99 |
| 2089 | 2 | 23 | 79.3  | 8.7   | 120   | weaned  | proximal | 8.72  | -21.52 | 3.1  |
| 2091 | 1 | 25 | 77.85 | 8.6   | 139   | weaned  | distal   | 10.43 | -21.56 | 3.03 |
| 2091 | 1 | 25 | 77.85 | 8.6   | 139   | weaned  | proximal | 10.37 | -21.56 | 3.04 |
| 2093 | 1 | 26 | 82.2  | 9.1   | 136   | weaned  | distal   | 7.53  | -21.18 | 3.07 |
| 2093 | 1 | 26 | 82.2  | 9.1   | 136   | weaned  | proximal | 7.66  | -21.02 | 2.98 |
| 2099 | 1 | 15 | 82.2  | 14.2  | 186   | part_bf | distal   | 9.00  | -20.01 | 3.07 |
| 2099 | 1 | 15 | 82.2  | 14.2  | 186   | part_bf | proximal | 8.91  | -20.53 | 2.99 |
| 2101 | 1 | 14 | 72.1  | 8.1   | 139   | part_bf | distal   | 11.32 | -21.42 | 3.07 |
| 2101 | 1 | 14 | 72.1  | 8.1   | 139   | part_bf | proximal | 11.27 | -21.38 | 3.09 |
| 2102 | 1 | 7  | 69.5  | 8.3   | 142   | ful_bf  | distal   | 11.2  | -21.84 | 3.11 |
| 2102 | 1 | 7  | 69.5  | 8.3   | 142   | ful_bf  | proximal | 11.11 | -21.94 | 3.1  |
| 2104 | 2 | 54 | 99.6  | 14.2  | 145   | weaned  | distal   | 8.22  | -22.23 | 3.11 |
| 2104 | 2 | 54 | 99.6  | 14.2  | 145   | weaned  | proximal | 8.17  | -22.33 | 3.16 |
| 2105 | 1 | 12 | 72.6  | 6.9   | 124   | part_bf | distal   | 9.94  | -21.44 | 3.04 |
| 2105 | 1 | 12 | 72.6  | 6.9   | 124   | part_bf | proximal | 9.25  | -22.18 | 3.85 |
| 2107 | 2 | 12 | 74.1  | 7.6   | 127   | part_bf | distal   | 11.76 | -22.1  | 3.08 |
| 2107 | 2 | 12 | 74.1  | 7.6   | 127   | part_bf | proximal | 11.82 | -22.17 | 2.98 |
| 2109 | 1 | 48 | 100.1 | 14.3  | 155   | weaned  | distal   | 8.53  | -22.37 | 3.1  |
| 2109 | 1 | 48 | 100.1 | 14.3  | 155   | weaned  | proximal | 8.66  | -22.24 | 3.1  |
| 2113 | 2 | 19 | 77.8  | 8.3   | 124   | part_bf | distal   | 8.53  | -22.13 | 3.12 |
| 2113 | 2 | 19 | 77.8  | 8.3   | 124   | part_bf | proximal | 8.26  | -22.38 | 3.1  |
| 2115 | 1 | 39 | 87.5  | 9.5   | 129   | weaned  | distal   | 8.03  | -22.27 | 2.96 |
| 2115 | 1 | 39 | 87.5  | 9.5   | 129   | weaned  | proximal | .     | .      | .    |
| 2127 | 1 | 7  | 67.8  | 7.3   | 131   | part_bf | distal   | 10.38 | -21.75 | 3.13 |
| 2127 | 1 | 7  | 67.8  | 7.3   | 131   | part_bf | proximal | 10.16 | -21.95 | 2.98 |
| 2129 | 2 | 28 | 85.85 | 10.7  | 144   | weaned  | distal   | 9.14  | -22.78 | 3.01 |

|      |   |    |       |      |       |         |          |       |        |      |
|------|---|----|-------|------|-------|---------|----------|-------|--------|------|
| 2129 | 2 | 28 | 85.85 | 10.7 | 144   | weaned  | proximal | 9.12  | -22.63 | 3.05 |
| 2131 | 1 | 50 | 91.5  | 12.3 | 152   | weaned  | distal   | 7.51  | -22.65 | 3.08 |
| 2131 | 1 | 50 | 91.5  | 12.3 | 152   | weaned  | proximal | 7.67  | -22.52 | 3.06 |
| 2133 | 1 | 33 | 87.9  | 10.9 | 146   | weaned  | distal   | 8.87  | -22.05 | 3.08 |
| 2133 | 1 | 33 | 87.9  | 10.9 | 146   | weaned  | proximal | 8.82  | -22.02 | 3.04 |
| 2135 | 2 | 33 | 86.8  | 11.3 | 152   | weaned  | distal   | 7.88  | -22.93 | 3.1  |
| 2135 | 2 | 33 | 86.8  | 11.3 | 152   | weaned  | proximal | 8.23  | -22.7  | 3.13 |
| 2137 | 1 | 26 | 87.1  | 11.2 | 147   | weaned  | distal   | 9.07  | -22.12 | 3.14 |
| 2137 | 1 | 26 | 87.1  | 11.2 | 147   | weaned  | proximal | 8.64  | -22.56 | 3.06 |
| 2139 | 1 | 28 | 87.6  | 12.2 | 155   | weaned  | distal   | 8.51  | -21.36 | 3.13 |
| 2139 | 1 | 28 | 87.6  | 12.2 | 155   | weaned  | proximal | 8.11  | -21.56 | 3,00 |
| 2141 | 2 | 54 | 99.35 | 15   | 162   | weaned  | distal   | 8.73  | -21.67 | 3,00 |
| 2141 | 2 | 54 | 99.35 | 15   | 162   | weaned  | proximal | 8.66  | -21.82 | 3.08 |
| 2143 | 2 | 28 | 93.4  | 13.2 | 161   | weaned  | distal   | 7.77  | -21.34 | 3.11 |
| 2143 | 2 | 28 | 93.4  | 13.2 | 161   | weaned  | proximal | 8.02  | -21.4  | 3.22 |
| 2145 | 1 | 8  | 72.1  | 9.3  | 156.5 | part_bf | distal   | 10.55 | -21.31 | 3.06 |
| 2145 | 1 | 8  | 72.1  | 9.3  | 156.5 | part_bf | proximal | 10.11 | -21.13 | 3.12 |
| 2147 | 1 | 20 | 78    | 8.5  | 133   | part_bf | distal   | 11.74 | -22.07 | 3.19 |
| 2147 | 1 | 20 | 78    | 8.5  | 133   | part_bf | proximal | 11.61 | -21.97 | 3.11 |
| 2148 | 2 | 9  | 65.6  | 4.3  | 82    | ful_bf  | distal   | 10.43 | -22.89 | 3.03 |
| 2148 | 2 | 9  | 65.6  | 4.3  | 82    | ful_bf  | proximal | 11,00 | -22.86 | 3,00 |
| 2150 | 2 | 28 | 77.3  | 9    | 144   | weaned  | distal   | 8.05  | -23.44 | 3.01 |
| 2150 | 2 | 28 | 77.3  | 9    | 144   | weaned  | proximal | 8.05  | -23.49 | 3.22 |
| 2156 | 1 | 49 | 99.5  | 13.5 | 147   | weaned  | distal   | 8.34  | -21.49 | 3.09 |
| 2156 | 1 | 49 | 99.5  | 13.5 | 147   | weaned  | proximal | 8.28  | -21.56 | 3.15 |
| 2157 | 1 | 48 | 99.1  | 11.8 | 130.5 | weaned  | distal   | 8.87  | -21.12 | 3.14 |
| 2157 | 1 | 48 | 99.1  | 11.8 | 130.5 | weaned  | proximal | 8.56  | -21.51 | 3.25 |
| 2158 | 2 | 13 | 73    | 8.1  | 141   | ful_bf  | distal   | 11.61 | -21.52 | 3,00 |
| 2158 | 2 | 13 | 73    | 8.1  | 141   | ful_bf  | proximal | 11.28 | -21.42 | 3.14 |
| 2159 | 2 | 7  | 63.4  | 5    | 111.5 | part_bf | distal   | 10.4  | -21.52 | 3.07 |
| 2159 | 2 | 7  | 63.4  | 5    | 111.5 | part_bf | proximal | 10.4  | -21.18 | 3.03 |
| 2160 | 2 | 21 | 74.2  | 7.7  | 131   | weaned  | distal   | 7.35  | -22.02 | 3.17 |
| 2160 | 2 | 21 | 74.2  | 7.7  | 131   | weaned  | proximal | 7.19  | -21.5  | 3.14 |
| 2162 | 1 | 27 | 84.2  | 9.9  | 142   | weaned  | distal   | 9.6   | -20.55 | 2.98 |
| 2162 | 1 | 27 | 84.2  | 9.9  | 142   | weaned  | proximal | 9.65  | -20.53 | 3.1  |
| 2164 | 1 | 27 | 82    | 10   | 140.5 | weaned  | distal   | 8.81  | -20.54 | 3.11 |
| 2164 | 1 | 27 | 82    | 10   | 140.5 | weaned  | proximal | 8.93  | -20.77 | 3.08 |
| 2166 | 1 | 43 | 96.7  | 12.2 | 141   | weaned  | distal   | 7.36  | -21.91 | 3.12 |
| 2166 | 1 | 43 | 96.7  | 12.2 | 141   | weaned  | proximal | 7.68  | -21.93 | 3.09 |
| 2167 | 2 | 42 | 96.2  | 10.8 | 124   | weaned  | distal   | 8.05  | -23.05 | 2.98 |
| 2167 | 2 | 42 | 96.2  | 10.8 | 124   | weaned  | proximal | 7.83  | -22.91 | 3.04 |
| 2169 | 1 | 11 | 71.2  | 7    | 123   | part_bf | distal   | 10.79 | -21.67 | 3.22 |
| 2169 | 1 | 11 | 71.2  | 7    | 123   | part_bf | proximal | 10.46 | -21.66 | 3.08 |
| 2171 | 1 | 14 | 78.9  | 8.9  | 132   | part_bf | distal   | 10.3  | -22.02 | 3.07 |
| 2171 | 1 | 14 | 78.9  | 8.9  | 132   | part_bf | proximal | 10.15 | -22.07 | 3.22 |
| 2175 | 2 | 40 | 90.55 | 12.5 | 146   | weaned  | distal   | 7.94  | -23.64 | 3.07 |
| 2175 | 2 | 40 | 90.55 | 12.5 | 146   | weaned  | proximal | 7.98  | -23.14 | 3.04 |
| 2177 | 1 | 20 | 79    | 9.5  | 125   | part_bf | distal   | 10.41 | -21.4  | 3.13 |
| 2177 | 1 | 20 | 79    | 9.5  | 125   | part_bf | proximal | 10.32 | -21.45 | 3.07 |

|      |   |    |       |       |       |         |          |       |        |      |
|------|---|----|-------|-------|-------|---------|----------|-------|--------|------|
| 2179 | 1 | 51 | 98.4  | 13.4  | 143.5 | weaned  | distal   | 8.12  | -21.62 | 3.01 |
| 2179 | 1 | 51 | 98.4  | 13.4  | 143.5 | weaned  | proximal | 8.11  | -21.64 | 2.98 |
| 2182 | 1 | 59 | 101.2 | 14.2  | 146   | weaned  | distal   | 8.47  | -21.82 | 3.25 |
| 2182 | 1 | 59 | 101.2 | 14.2  | 146   | weaned  | proximal | 8.61  | -21.8  | 3.14 |
| 3008 | 1 | 51 | 92.85 | 10.5  | 128.5 | weaned  | distal   | 8.39  | -23.26 | 3,00 |
| 3008 | 1 | 51 | 92.85 | 10.5  | 128.5 | weaned  | proximal | 8.52  | -23.58 | 2.95 |
| 3009 | 2 | 52 | 93.05 | 12.6  | 150.5 | weaned  | distal   | 8.42  | -22.57 | 3.35 |
| 3009 | 2 | 52 | 93.05 | 12.6  | 150.5 | weaned  | proximal | 8.55  | -22.35 | 3.41 |
| 3013 | 2 | 31 | 82.2  | 11.45 | 147.5 | weaned  | distal   | 6.36  | -22.62 | 2.95 |
| 3013 | 2 | 31 | 82.2  | 11.45 | 147.5 | weaned  | proximal | 6.39  | -22.7  | 2.96 |
| 3015 | 2 | 13 | 74.85 | 9.1   | 135.5 | part_bf | distal   | 10.14 | -20.96 | 3.14 |
| 3015 | 2 | 13 | 74.85 | 9.1   | 135.5 | part_bf | proximal | 10.27 | -20.99 | 3.15 |
| 3017 | 2 | 37 | 88.2  | 12.1  | 152.5 | weaned  | distal   | 7.83  | -22.3  | 3.14 |
| 3017 | 2 | 37 | 88.2  | 12.1  | 152.5 | weaned  | proximal | 7.82  | -21.77 | 2.95 |
| 3019 | 2 | 52 | 95.45 | 13.05 | 155   | weaned  | distal   | 11.55 | -22.64 | 3.26 |
| 3019 | 2 | 52 | 95.45 | 13.05 | 155   | weaned  | proximal | 11.74 | -22.65 | 3.01 |
| 3021 | 1 | 40 | 98.15 | 13.4  | 154   | weaned  | distal   | 8.87  | -22.1  | 3.11 |
| 3021 | 1 | 40 | 98.15 | 13.4  | 154   | weaned  | proximal | 8.87  | -22.12 | 3.07 |
| 3023 | 1 | 18 | 84.15 | 11.75 | 145.5 | part_bf | distal   | 10.2  | -22.06 | 3.03 |
| 3023 | 1 | 18 | 84.15 | 11.75 | 145.5 | part_bf | proximal | 10.17 | -22.03 | 3.11 |
| 3024 | 1 | 7  | 66.55 | 6.4   | 120   | part_bf | distal   | 10.48 | -21.79 | 3.11 |
| 3024 | 1 | 7  | 66.55 | 6.4   | 120   | part_bf | proximal | 10.59 | -21.82 | 3.19 |
| 3026 | 2 | 17 | 77.2  | 9.6   | 154   | part_bf | distal   | 10.03 | -22.16 | 3.15 |
| 3026 | 2 | 17 | 77.2  | 9.6   | 154   | part_bf | proximal | 9.88  | -21.89 | 3.12 |
| 3028 | 2 | 30 | 89.25 | 13.3  | 157   | weaned  | distal   | .     | .      | .    |
| 3028 | 2 | 30 | 89.25 | 13.3  | 157   | weaned  | proximal | 8.32  | -22.35 | 3.16 |
| 3030 | 2 | 7  | 62.35 | 6.1   | 120   | part_bf | distal   | 11.27 | -22.27 | 3.25 |
| 3030 | 2 | 7  | 62.35 | 6.1   | 120   | part_bf | proximal | 11.02 | -22.22 | 3.26 |
| 3032 | 2 | 32 | 86.75 | 11.45 | 149   | weaned  | distal   | 8.79  | -21.76 | 3.03 |
| 3032 | 2 | 32 | 86.75 | 11.45 | 149   | weaned  | proximal | 8.78  | -21.4  | 3.03 |
| 3035 | 1 | 36 | 86.6  | 10.9  | 146.5 | part_bf | distal   | 8.45  | -22.68 | 3.02 |
| 3035 | 1 | 36 | 86.6  | 10.9  | 146.5 | part_bf | proximal | 8.11  | -22.33 | 3.26 |
| 3037 | 2 | 7  | 65.15 | 6.05  | 113   | part_bf | distal   | 12.22 | -21.89 | 3.25 |
| 3037 | 2 | 7  | 65.15 | 6.05  | 113   | part_bf | proximal | 12.52 | -21.99 | 3.18 |
| 3041 | 1 | 36 | 88.35 | 11.65 | 147.5 | weaned  | distal   | 7.9   | -22.64 | 3.05 |
| 3041 | 1 | 36 | 88.35 | 11.65 | 147.5 | weaned  | proximal | 8.03  | -22.65 | 3.18 |
| 3043 | 2 | 33 | 89.2  | 11.2  | 144.5 | weaned  | distal   | 8.16  | -22.94 | 3.06 |
| 3043 | 2 | 33 | 89.2  | 11.2  | 144.5 | weaned  | proximal | 8.38  | -22.58 | 3.24 |
| 3045 | 2 | 25 | 79.6  | 10.6  | 147   | part_bf | distal   | 7.93  | -21.8  | 3.19 |
| 3045 | 2 | 25 | 79.6  | 10.6  | 147   | part_bf | proximal | 7.96  | -21.68 | 3.28 |
| 3047 | 1 | 11 | 74.35 | 7.8   | 124   | part_bf | distal   | 10,00 | -21.51 | 3.24 |
| 3047 | 1 | 11 | 74.35 | 7.8   | 124   | part_bf | proximal | 10.09 | -21.55 | 3.16 |
| 3049 | 2 | 22 | 65.25 | 8.4   | 133   | weaned  | distal   | 8.18  | -21.54 | 2.97 |
| 3049 | 2 | 22 | 65.25 | 8.4   | 133   | weaned  | proximal | 8.05  | -21.45 | 3.13 |
| 3051 | 2 | 40 | 89.1  | 10.8  | 138.5 | weaned  | distal   | 7.67  | -21.04 | 3.22 |
| 3051 | 2 | 40 | 89.1  | 10.8  | 138.5 | weaned  | proximal | 7.95  | -21.14 | 2.97 |
| 3053 | 1 | 45 | 90.1  | 12.8  | 145   | weaned  | distal   | 7.68  | -22.85 | 3.19 |
| 3053 | 1 | 45 | 90.1  | 12.8  | 145   | weaned  | proximal | 7.48  | -23.12 | 3.14 |
| 3059 | 1 | 30 | 77.6  | 8.6   | 127.5 | part_bf | distal   | 8.8   | -21.49 | 3.36 |

|      |   |    |        |       |       |         |          |       |        |      |
|------|---|----|--------|-------|-------|---------|----------|-------|--------|------|
| 3059 | 1 | 30 | 77.6   | 8.6   | 127.5 | part_bf | proximal | 8.65  | -21.37 | 3.27 |
| 3061 | 1 | 19 | 74.85  | 8.7   | 139.5 | part_bf | distal   | 9.54  | -22.92 | 3.09 |
| 3061 | 1 | 19 | 74.85  | 8.7   | 139.5 | part_bf | proximal | 9.23  | -22.88 | 3.16 |
| 3063 | 1 | 54 | 103.05 | 13.2  | 137.5 | weaned  | distal   | 7.42  | -22.64 | 3.02 |
| 3063 | 1 | 54 | 103.05 | 13.2  | 137.5 | weaned  | proximal | 7.43  | -22.58 | 3.01 |
| 3066 | 2 | 52 | 98.45  | 12.8  | 140.5 | weaned  | distal   | 7.84  | -23.12 | 3.01 |
| 3066 | 2 | 52 | 98.45  | 12.8  | 140.5 | weaned  | proximal | 7.64  | -22.76 | 3.1  |
| 3068 | 1 | 42 | 96.2   | 14.55 | 160.5 | weaned  | distal   | 8.28  | -22.36 | 3.1  |
| 3068 | 1 | 42 | 96.2   | 14.55 | 160.5 | weaned  | proximal | 8.31  | -22.19 | 3.08 |
| 3070 | 1 | 24 | 81.3   | 9.85  | 133.5 | part_bf | distal   | 8.32  | -21.06 | 3.08 |
| 3070 | 1 | 24 | 81.3   | 9.85  | 133.5 | part_bf | proximal | 8.16  | -20.92 | 3.16 |
| 3074 | 1 | 39 | 91.15  | 14.1  | 161.5 | weaned  | distal   | 7.36  | -20.98 | 2.99 |
| 3074 | 1 | 39 | 91.15  | 14.1  | 161.5 | weaned  | proximal | 7.68  | -21.36 | 3.13 |
| 3076 | 1 | 21 | 81.3   | 6.35  | 129.5 | part_bf | distal   | 10.01 | -21.75 | 2.96 |
| 3076 | 1 | 21 | 81.3   | 6.35  | 129.5 | part_bf | proximal | 9.73  | -21.51 | 3.01 |
| 3078 | 1 | 27 | 85.2   | 11.25 | 142.5 | weaned  | distal   | 6.87  | -23.11 | 3.02 |
| 3078 | 1 | 27 | 85.2   | 11.25 | 142.5 | weaned  | proximal | 7.02  | -23.01 | 3.28 |
| 3081 | 2 | 55 | 96.3   | 10.7  | 144.5 | weaned  | distal   | 8.78  | -23.07 | 2.98 |
| 3081 | 2 | 55 | 96.3   | 10.7  | 144.5 | weaned  | proximal | 8.83  | -23.00 | 2.99 |
| 3084 | 1 | 27 | 82.1   | 10.45 | 139   | part_bf | distal   | 9.76  | -21.65 | 3.01 |
| 3084 | 1 | 27 | 82.1   | 10.45 | 139   | part_bf | proximal | 9.66  | -21.77 | 3.01 |
| 3086 | 2 | 34 | 84.3   | 11.1  | 148.5 | weaned  | distal   | 8.66  | -22.26 | 3.16 |
| 3086 | 2 | 34 | 84.3   | 11.1  | 148.5 | weaned  | proximal | 8.69  | -22.13 | 3.1  |
| 3088 | 2 | 31 | 85.1   | 10.3  | 138.5 | part_bf | distal   | 10.69 | -22.24 | 3.24 |
| 3088 | 2 | 31 | 85.1   | 10.3  | 138.5 | part_bf | proximal | 10.55 | -22.44 | 3.11 |
| 3093 | 2 | 38 | 88.35  | 12.7  | 152.5 | weaned  | distal   | 8.73  | -21.03 | 3.23 |
| 3093 | 2 | 38 | 88.35  | 12.7  | 152.5 | weaned  | proximal | 9.08  | -21.18 | 3.08 |
| 3095 | 1 | 14 | 84.35  | 12.85 | 164.5 | part_bf | distal   | 9.27  | -21.48 | 3.2  |
| 3095 | 1 | 14 | 84.35  | 12.85 | 164.5 | part_bf | proximal | 9.42  | -21.21 | 3.00 |
| 3101 | 2 | 28 | 81.95  | 10.35 | 139.5 | part_bf | distal   | 9.88  | -21.6  | 3.04 |
| 3101 | 2 | 28 | 81.95  | 10.35 | 139.5 | part_bf | proximal | 9.76  | -21.92 | 3.02 |
| 3104 | 2 | 39 | 89.1   | 11    | 135.5 | weaned  | distal   | 6.94  | -22.47 | .    |
| 3104 | 2 | 39 | 89.1   | 11    | 135.5 | weaned  | proximal | 6.94  | -22.47 | 3.13 |
| 3106 | 2 | 17 | 77.45  | 9.55  | 143.5 | part_bf | distal   | 9.96  | -22.52 | 3.04 |
| 3106 | 2 | 17 | 77.45  | 9.55  | 143.5 | part_bf | proximal | 9.44  | -22.45 | 3.2  |
| 3108 | 1 | 14 | 66.65  | 7.15  | 123.5 | part_bf | distal   | 9.63  | -22.02 | 3.00 |
| 3108 | 1 | 14 | 66.65  | 7.15  | 123.5 | part_bf | proximal | 9.49  | -22.43 | 3.05 |
| 3112 | 2 | 10 | 69.15  | 6.95  | 131   | ful_bf  | distal   | 11.23 | -22.33 | 3.36 |
| 3112 | 2 | 10 | 69.15  | 6.95  | 131   | ful_bf  | proximal | 11.52 | -22.25 | 3.05 |
| 3114 | 1 | 58 | 101.35 | 16.45 | 127.5 | weaned  | distal   | 8.76  | -23.22 | 3.06 |
| 3114 | 1 | 58 | 101.35 | 16.45 | 127.5 | weaned  | proximal | 8.34  | -23.26 | 3.08 |
| 3116 | 2 | 9  | 71.85  | 8.3   | 142   | part_bf | distal   | 9.89  | -20.85 | 3.06 |
| 3116 | 2 | 9  | 71.85  | 8.3   | 142   | part_bf | proximal | 9.9   | -21.01 | 3.15 |
| 3118 | 2 | 25 | 79.25  | 9.75  | 140.5 | weaned  | distal   | 9.59  | -22.95 | 3.03 |
| 3118 | 2 | 25 | 79.25  | 9.75  | 140.5 | weaned  | proximal | 9.34  | -22.87 | 3.13 |
| 3121 | 2 | 22 | 77.45  | 9.45  | 136.5 | weaned  | distal   | 9.59  | -21.93 | 3.08 |
| 3121 | 2 | 22 | 77.45  | 9.45  | 136.5 | weaned  | proximal | 8.7   | -22.04 | 3.08 |
| 3125 | 2 | 21 | 79.65  | 10.2  | 142.5 | part_bf | distal   | 10.94 | -21.47 | 3.21 |
| 3125 | 2 | 21 | 79.65  | 10.2  | 142.5 | part_bf | proximal | 10.83 | -21.73 | 3.03 |

|      |   |    |        |       |       |         |          |       |        |      |
|------|---|----|--------|-------|-------|---------|----------|-------|--------|------|
| 3127 | 1 | 22 | 82.85  | 10.85 | 142.5 | part_bf | distal   | 10.6  | -21.83 | 3.12 |
| 3127 | 1 | 22 | 82.85  | 10.85 | 142.5 | part_bf | proximal | 10.71 | -21.9  | 3.02 |
| 3132 | 1 | 20 | 77.65  | 9.45  | 131   | part_bf | distal   | 9.04  | -21.5  | 3.12 |
| 3132 | 1 | 20 | 77.65  | 9.45  | 131   | part_bf | proximal | 9.05  | -21.37 | 3.02 |
| 3133 | 2 | 6  | 62.45  | 5.4   | 113   | part_bf | distal   | 10.86 | -22.52 | 2.98 |
| 3133 | 2 | 6  | 62.45  | 5.4   | 113   | part_bf | proximal | 10.94 | -22.84 | 3.15 |
| 3143 | 1 | 8  | 70.1   | 6.85  | 123   | part_bf | distal   | 11.63 | -22.87 | 3.11 |
| 3143 | 1 | 8  | 70.1   | 6.85  | 123   | part_bf | proximal | 11.8  | -22.74 | 3.09 |
| 3146 | 1 | 38 | 85.25  | 11.45 | 140.5 | weaned  | distal   | 7.7   | -23.19 | 3.12 |
| 3146 | 1 | 38 | 85.25  | 11.45 | 140.5 | weaned  | proximal | 8.19  | -23.68 | 3.1  |
| 3148 | 2 | 44 | 98.3   | 13.95 | 143   | weaned  | distal   | 7.66  | -22.16 | 3.04 |
| 3148 | 2 | 44 | 98.3   | 13.95 | 143   | weaned  | proximal | 7.55  | -22.00 | 3.03 |
| 4004 | 1 | 51 | 98.65  | 15.05 | 161.5 | weaned  | distal   | 8.05  | -22.46 | 3.23 |
| 4004 | 1 | 51 | 98.65  | 15.05 | 161.5 | weaned  | proximal | 7.79  | -22.54 | 3.22 |
| 4006 | 1 | 41 | 92.15  | 15.5  | 157   | weaned  | distal   | 8.24  | -22.25 | 3.24 |
| 4006 | 1 | 41 | 92.15  | 15.5  | 157   | weaned  | proximal | 8.14  | -22.08 | 3.00 |
| 4008 | 1 | 40 | 96.65  | 14.25 | 167   | weaned  | distal   | 8.94  | -22.53 | 3.06 |
| 4008 | 1 | 40 | 96.65  | 14.25 | 167   | weaned  | proximal | 9.23  | -22.3  | 3.01 |
| 4010 | 1 | 34 | 103.35 | 11.6  | 136   | weaned  | distal   | 8.35  | -21.77 | 3.09 |
| 4010 | 1 | 34 | 103.35 | 11.6  | 136   | weaned  | proximal | 8.08  | -22.06 | 2.92 |
| 4011 | 2 | 52 | 103.35 | 14.5  | 156.5 | weaned  | distal   | 8.25  | -21.59 | 3.1  |
| 4011 | 2 | 52 | 103.35 | 14.5  | 156.5 | weaned  | proximal | 8.41  | -21.59 | 3.05 |
| 4014 | 2 | 11 | 97.7   | 7.15  | 100   | part_bf | distal   | 7.68  | -22.14 | 3.12 |
| 4014 | 2 | 11 | 97.7   | 7.15  | 100   | part_bf | proximal | 7.52  | -22.1  | 3.00 |
| 4015 | 2 | 45 | 92.65  | 11.6  | 140   | weaned  | distal   | 8.61  | -21.54 | 3.14 |
| 4015 | 2 | 45 | 92.65  | 11.6  | 140   | weaned  | proximal | 8.82  | -21.79 | 3.2  |
| 4018 | 2 | 21 | 76.45  | 9.4   | 138.5 | part_bf | distal   | 9.67  | -22.13 | 3.1  |
| 4018 | 2 | 21 | 76.45  | 9.4   | 138.5 | part_bf | proximal | 9.96  | -22.28 | 3.16 |
| 4020 | 2 | 17 | 71.75  | 7.35  | 126.5 | part_bf | distal   | 9.72  | -22.31 | 4.07 |
| 4020 | 2 | 17 | 71.75  | 7.35  | 126.5 | part_bf | proximal | 9.83  | -22.65 | 4.17 |
| 4022 | 2 | 52 | 101.9  | 14.5  | 152.5 | weaned  | distal   | 7.8   | -21.83 | 3.12 |
| 4022 | 2 | 52 | 101.9  | 14.5  | 152.5 | weaned  | proximal | 7.97  | -21.86 | 3.1  |
| 4026 | 2 | 49 | 102.95 | 15.6  | 157.5 | weaned  | distal   | 8.73  | -21.26 | 3.01 |
| 4026 | 2 | 49 | 102.95 | 15.6  | 157.5 | weaned  | proximal | 8.49  | -21.2  | 3.17 |
| 4028 | 1 | 50 | 96.05  | 13.6  | 146   | weaned  | distal   | 7.44  | -22.8  | 3.24 |
| 4028 | 1 | 50 | 96.05  | 13.6  | 146   | weaned  | proximal | 7.67  | -22.59 | 2.99 |
| 4033 | 1 | 55 | 95.65  | 11.6  | 135   | weaned  | distal   | 8.05  | -22.47 | 2.98 |
| 4033 | 1 | 55 | 95.65  | 11.6  | 135   | weaned  | proximal | 7.92  | -22.32 | 3.13 |
| 4036 | 1 | 52 | 104.65 | 15.9  | 156.5 | weaned  | distal   | 7.42  | -23.74 | 3.22 |
| 4036 | 1 | 52 | 104.65 | 15.9  | 156.5 | weaned  | proximal | 6.91  | -23.63 | 3.17 |
| 4038 | 1 | 26 | 80.25  | 9.8   | 131.5 | part_bf | distal   | 9.15  | -23.39 | 3.21 |
| 4038 | 1 | 26 | 80.25  | 9.8   | 131.5 | part_bf | proximal | 9.31  | -23.08 | 3.21 |
| 4040 | 2 | 33 | 86.35  | 12.1  | 155   | weaned  | proximal | 7.79  | -23.14 | 3.06 |
| 4041 | 1 | 28 | 93.35  | 13    | 146.5 | weaned  | distal   | 8.32  | -22.99 | 3.00 |
| 4041 | 1 | 28 | 93.35  | 13    | 146.5 | weaned  | proximal | 8.27  | -22.96 | 3.02 |
| 4043 | 1 | 17 | 80.1   | 10.3  | 139   | part_bf | distal   | 8.21  | -22.69 | 3.04 |
| 4043 | 1 | 17 | 80.1   | 10.3  | 139   | part_bf | proximal | 8.19  | -22.75 | 3.04 |
| 4046 | 2 | 31 | 88.15  | 11.5  | 140.5 | weaned  | distal   | 7.65  | -22.26 | 3.2  |
| 4046 | 2 | 31 | 88.15  | 11.5  | 140.5 | weaned  | proximal | 7.68  | -22.88 | 3.21 |



|      |   |    |       |       |       |         |          |       |        |      |
|------|---|----|-------|-------|-------|---------|----------|-------|--------|------|
| 4048 | 2 | 59 | 109.3 | 16.05 | 154   | weaned  | distal   | 6.78  | -22.63 | 3.12 |
| 4048 | 2 | 59 | 109.3 | 16.05 | 154   | weaned  | proximal | 6.56  | -22.89 | 2.95 |
| 4050 | 1 | 45 | 92.3  | 13.2  | 150.5 | weaned  | distal   | 8.33  | -22.92 | 3.17 |
| 4050 | 1 | 45 | 92.3  | 13.2  | 150.5 | weaned  | proximal | 8.27  | -22.88 | 3.15 |
| 4052 | 2 | 32 | 83.55 | 11.2  | 151.5 | weaned  | distal   | 7.61  | -22.29 | 3.16 |
| 4052 | 2 | 32 | 83.55 | 11.2  | 151.5 | weaned  | proximal | 7.8   | -21.96 | 3.04 |
| 4054 | 1 | 33 | 88.7  | 10.8  | 132.5 | weaned  | distal   | 7.02  | -22.07 | 3.06 |
| 4054 | 1 | 33 | 88.7  | 10.8  | 132.5 | weaned  | proximal | 7.23  | -22.08 | 3.21 |
| 4056 | 2 | 46 | 98.2  | 13.7  | 155.5 | weaned  | distal   | 8.5   | -22.57 | 3.1  |
| 4056 | 2 | 46 | 98.2  | 13.7  | 155.5 | weaned  | proximal | 8.12  | -22.63 | 2.99 |
| 4058 | 1 | 42 | 92.25 | 12.3  | 150.5 | weaned  | distal   | 7.94  | -21.41 | 3.16 |
| 4058 | 1 | 42 | 92.25 | 12.3  | 150.5 | weaned  | proximal | 7.66  | -21.95 | 3.18 |
| 4062 | 2 | 33 | 86.35 | 12    | 145.5 | weaned  | distal   | 8.3   | -21.44 | 3.43 |
| 4062 | 2 | 33 | 86.35 | 12    | 145.5 | weaned  | proximal | 8.41  | -21.54 | 3.22 |
| 4064 | 1 | 22 | 80.3  | 9.1   | 136   | weaned  | distal   | 8.74  | -21.27 | 3.1  |
| 4064 | 1 | 22 | 80.3  | 9.1   | 136   | weaned  | proximal | 8.6   | -21.66 | 3.01 |
| 4067 | 2 | 15 | 75.1  | 9.8   | 155   | part_bf | distal   | 10.67 | -20.94 | 3.33 |
| 4067 | 2 | 15 | 75.1  | 9.8   | 155   | part_bf | proximal | 10.37 | -21.54 | 3.3  |
| 4069 | 1 | 33 | 88.6  | 11.3  | 149   | weaned  | distal   | 7.99  | -22.36 | 2.98 |
| 4069 | 1 | 33 | 88.6  | 11.3  | 149   | weaned  | proximal | 7.68  | -22.47 | 3.3  |
| 4071 | 2 | 55 | 96.7  | 13.1  | 148.5 | weaned  | distal   | 8.4   | -22.49 | 2.93 |
| 4071 | 2 | 55 | 96.7  | 13.1  | 148.5 | weaned  | proximal | 8.6   | -22.88 | 3.11 |
| 4073 | 2 | 55 | 95.25 | 12.5  | 154.5 | part_bf | distal   | 8.21  | -21.73 | 3.09 |
| 4073 | 2 | 55 | 95.25 | 12.5  | 154.5 | part_bf | proximal | 7.89  | -21.75 | 3.07 |
| 4075 | 1 | 47 | 99.4  | 15.4  | 155.5 | weaned  | distal   | 7.89  | -22.67 | 3.1  |
| 4075 | 1 | 47 | 99.4  | 15.4  | 155.5 | weaned  | proximal | 7.95  | -22.56 | 3.07 |
| 4077 | 1 | 28 | 84.25 | 10.7  | 143.5 | weaned  | distal   | 8.17  | -21.31 | 2.96 |
| 4077 | 1 | 28 | 84.25 | 10.7  | 143.5 | weaned  | proximal | 7.97  | -21.32 | 2.96 |
| 4082 | 2 | 42 | 88.3  | 11.3  | 152.5 | weaned  | distal   | 7.88  | -22.17 | 3.07 |
| 4082 | 2 | 42 | 88.3  | 11.3  | 152.5 | weaned  | proximal | 7.76  | -22.17 | 3.01 |
| 4085 | 2 | 25 | 83.5  | 11.5  | 152   | weaned  | distal   | 8.73  | -21.24 | 3.11 |
| 4085 | 2 | 25 | 83.5  | 11.5  | 152   | weaned  | proximal | 9.03  | -20.93 | 3.16 |
| 4087 | 1 | 19 | 80.2  | 9.5   | 134.5 | part_bf | distal   | 9.59  | -21.78 | 4.3  |
| 4087 | 1 | 19 | 80.2  | 9.5   | 134.5 | part_bf | proximal | 10.29 | -21.34 | 3.83 |
| 4089 | 1 | 39 | 93.3  | 12.3  | 152   | weaned  | distal   | 7.38  | -22.62 | 3.01 |
| 4089 | 1 | 39 | 93.3  | 12.3  | 152   | weaned  | proximal | 7.31  | -22.51 | 3.17 |
| 4091 | 2 | 36 | 87.05 | 11.9  | 155.5 | weaned  | distal   | 8.28  | -22.99 | 3.02 |
| 4091 | 2 | 36 | 87.05 | 11.9  | 155.5 | weaned  | proximal | 8.5   | -22.85 | 3.05 |
| 4093 | 2 | 49 | 98.75 | 14.1  | 150   | weaned  | distal   | 10.13 | -23.3  | 3.34 |
| 4093 | 2 | 49 | 98.75 | 14.1  | 150   | weaned  | proximal | 10.31 | -22.28 | 3.9  |
| 4095 | 2 | 42 | 93.05 | 13    | 155.5 | weaned  | distal   | 8.44  | -22.08 | 3.17 |
| 4095 | 2 | 42 | 93.05 | 13    | 155.5 | weaned  | proximal | 8.51  | -22.36 | 3.09 |
| 4096 | 1 | 50 | 95.8  | 12.4  | 145   | weaned  | distal   | 7.98  | -22.65 | 3.14 |
| 4096 | 1 | 50 | 95.8  | 12.4  | 145   | weaned  | proximal | 8.06  | -22.32 | 3.13 |
| 4098 | 2 | 46 | 94.1  | 13    | 143.5 | weaned  | distal   | 8.4   | -21.98 | 3.02 |
| 4098 | 2 | 46 | 94.1  | 13    | 143.5 | weaned  | proximal | 8.41  | -22.93 | 3.07 |
| 4100 | 1 | 27 | 80.65 | 9.7   | 138.5 | weaned  | distal   | 8.47  | -21.58 | 3.03 |
| 4100 | 1 | 27 | 80.65 | 9.7   | 138.5 | weaned  | proximal | 8.35  | -21.36 | 3.28 |
| 4101 | 2 | 48 | 95.55 | 12    | 137.5 | weaned  | distal   | 7.78  | -22.13 | 3.13 |

|      |   |    |        |       |       |         |          |       |        |      |
|------|---|----|--------|-------|-------|---------|----------|-------|--------|------|
| 4101 | 2 | 48 | 95.55  | 12    | 137.5 | weaned  | proximal | 7.87  | -22.19 | 3.03 |
| 4105 | 2 | 31 | 81.65  | 11.5  | 153   | weaned  | distal   | 7.28  | -23.08 | 3.14 |
| 4105 | 2 | 31 | 81.65  | 11.5  | 153   | weaned  | proximal | 7.18  | -22.91 | 3.13 |
| 4106 | 1 | 8  | 70.25  | 7.3   | 128.5 | weaned  | distal   | 10.97 | -21.3  | 3.55 |
| 4106 | 1 | 8  | 70.25  | 7.3   | 128.5 | weaned  | proximal | 11.13 | -21.74 | 3.14 |
| 4108 | 2 | 47 | 90.65  | 11.45 | 140   | weaned  | distal   | 8.52  | -22.08 | 2.98 |
| 4108 | 2 | 47 | 90.65  | 11.45 | 140   | weaned  | proximal | 10.23 | -22.02 | 3.69 |
| 4110 | 2 | 50 | 104.05 | 18    | 178.5 | weaned  | proximal | 7.59  | -22.63 | 3.26 |
| 4112 | 2 | 14 | 77.65  | 8.2   | 135   | part_bf | distal   | 7.52  | -21.92 | 3.17 |
| 4112 | 2 | 14 | 77.65  | 8.2   | 135   | part_bf | proximal | 7.66  | -21.79 | 3.46 |
| 4114 | 1 | 22 | 80.75  | 10.1  | 142.5 | weaned  | distal   | 7.64  | -23.41 | 2.98 |
| 4114 | 1 | 22 | 80.75  | 10.1  | 142.5 | weaned  | proximal | 7.52  | -23.15 | 3.37 |
| 4115 | 1 | 36 | 75     | 7.8   | 112   | part_bf | distal   | 8.1   | -22.73 | 3.08 |
| 4115 | 1 | 36 | 75     | 7.8   | 112   | part_bf | proximal | 7.46  | -23.2  | 3.43 |
| 4116 | 1 | 50 | 102.1  | 15    | 161   | weaned  | distal   | 7.66  | -23.7  | 3.16 |
| 4116 | 1 | 50 | 102.1  | 15    | 161   | weaned  | proximal | 7.79  | -23.12 | 3.02 |
| 4118 | 2 | 51 | 99.3   | 14    | 150   | weaned  | distal   | 8.87  | -22.12 | 3.02 |
| 4118 | 2 | 51 | 99.3   | 14    | 150   | weaned  | proximal | 9.16  | -22.02 | 3.07 |
| 4120 | 1 | 18 | 82.25  | 9.6   | 143.5 | part_bf | distal   | 9.27  | -20.67 | 3.12 |
| 4120 | 1 | 18 | 82.25  | 9.6   | 143.5 | part_bf | proximal | 9.03  | -20.83 | 2.98 |
| 4123 | 1 | 8  | 67.5   | 7     | 132   | part_bf | distal   | 7.47  | -20.91 | 2.96 |
| 4123 | 1 | 8  | 67.5   | 7     | 132   | part_bf | proximal | 7.58  | -21.05 | 2.95 |
| 4124 | 1 | 7  | 66.45  | 7.8   | 146   | ful_bf  | distal   | 10.89 | -21.59 | 3.36 |
| 4124 | 1 | 7  | 66.45  | 7.8   | 146   | ful_bf  | proximal | 10.96 | -21.95 | 3.32 |
| 4126 | 2 | 9  | 69.65  | 7.8   | 149   | part_bf | distal   | 12.48 | -20.94 | 3.25 |
| 4126 | 2 | 9  | 69.65  | 7.8   | 149   | part_bf | proximal | 12.31 | -21.5  | 3.19 |
| 4130 | 2 | 6  | 69.65  | 8.4   | 156.5 | part_bf | distal   | 11.33 | -20.69 | 3.09 |
| 4130 | 2 | 6  | 69.65  | 8.4   | 156.5 | part_bf | proximal | 11.13 | -20.94 | 3.26 |
| 4132 | 2 | 49 | 95.85  | 13.9  | 155.5 | weaned  | distal   | 8.15  | -22.32 | 3.06 |
| 4132 | 2 | 49 | 95.85  | 13.9  | 155.5 | weaned  | proximal | 7.93  | -22.31 | 3.19 |
| 4134 | 1 | 47 | 89.75  | 12.7  | 151   | weaned  | distal   | 8.13  | -22.23 | 3.12 |
| 4134 | 1 | 47 | 89.75  | 12.7  | 151   | weaned  | proximal | 8.33  | -22.18 | 3.15 |
| 4140 | 1 | 52 | 94.3   | 13.8  | 153.5 | weaned  | distal   | 7.63  | -22.26 | 3.03 |
| 4140 | 1 | 52 | 94.3   | 13.8  | 153.5 | weaned  | proximal | 7.82  | -22.23 | 3.13 |
